# Supplementary material for: Surfactant-free dispersion polymerization as an efficient synthesis route to a successful encapsulation of nanoparticles
Source: Royal Society of Chemistry journal article supplement (doi:10.1039/c4ra07475k), 2014-09-09
Supplement: c4ra07475k1.pdf [file c4ra07475k1.pdf]

## Supporting Information

### Surfactant-free dispersion polymerization as an Efficient Synthesis Route to a Successful Encapsulation of Nanoparticles

I-Chen Chou<sup>1</sup>, Shou-I Chen<sup>4</sup>, Wen-Yen Chiu<sup>\*,1,2,3</sup>

<sup>1</sup>Department of Chemical Engineering, National Taiwan University, Taipei, Taiwan

<sup>2</sup>Institute of Polymer Science and Engineering, National Taiwan University, Taipei,  
Taiwan

<sup>3</sup>Department of Materials Science and Engineering, National Taiwan University,  
Taipei, Taiwan

<sup>4</sup>Department of Polymer Solution & Reaction Material & Chemical Research  
Laboratories, Industrial Technology Research Institute, Hsinchu, Taiwan

Tel: +886-2-23623259

Fax: +886-2-23623259

E-mail: ycchiu@ntu.edu.tw

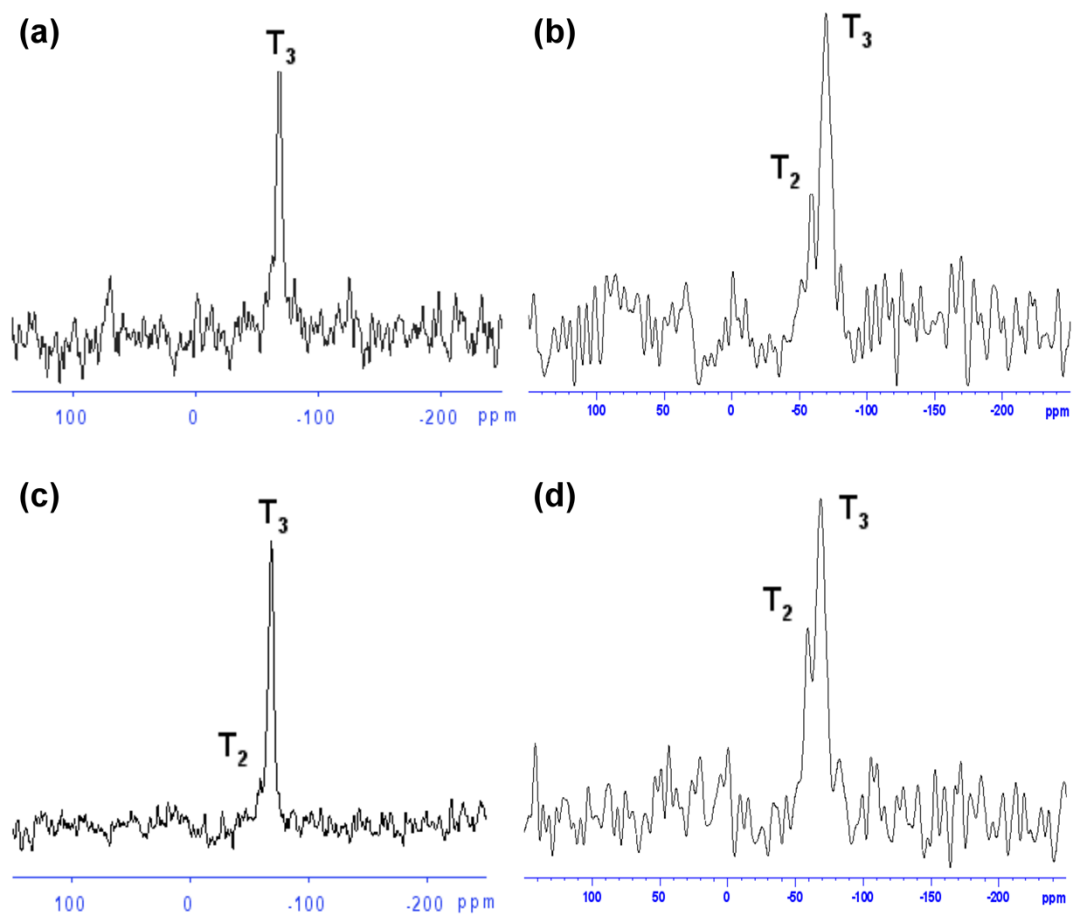

**Figure S1.**  $^{29}\text{Si}$  solid state NMR spectra of 3-(Trimethoxysilyl)propyl methacrylate (MSMA) modified MOGUL<sup>®</sup> L CB. (a) CB 1. (b) CB 2. (c) CB 5. (d) CB 7.

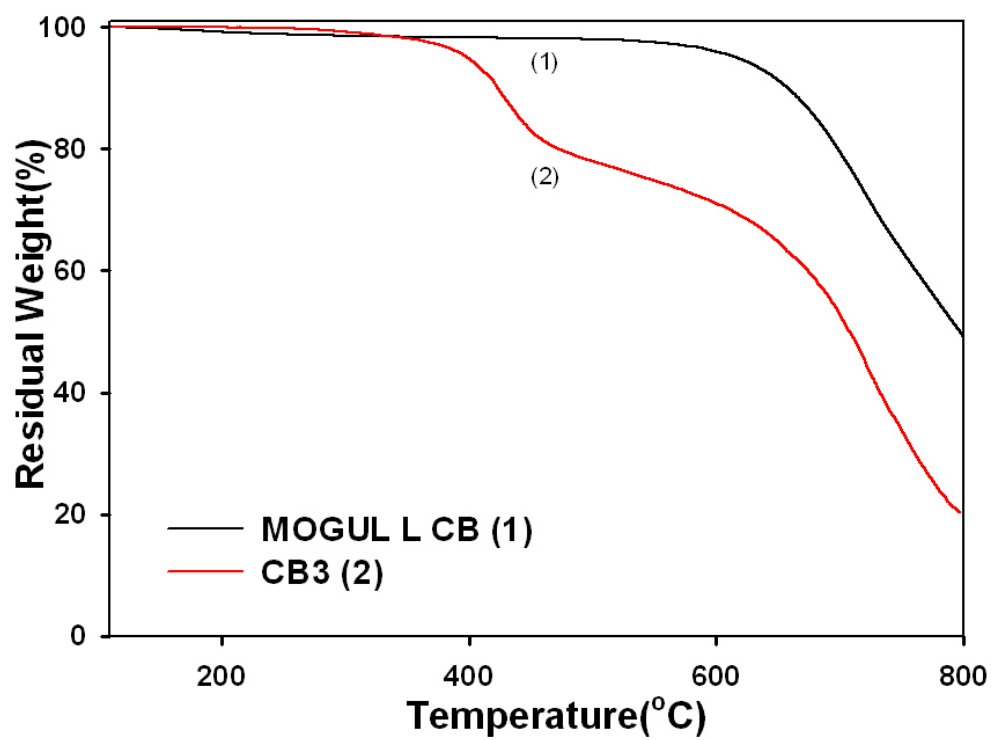

**Figure S2.** Thermogravimetric Analysis (TGA) analysis of pristine MOGUL<sup>®</sup> L CB and MSMA modified CB3.

**Table S1.** Recipe for the Silane-Modified SiO<sub>2</sub> Nanoparticles for Encapsulation.<sup>a</sup>

| Sample Code         | Ethanol/Water (ml) | Ammonium Hydroxide (g) | TEOS (g) | Silane (g) | Size (nm) <sup>b</sup> | Zeta Potential (mV) <sup>c</sup> |
|---------------------|--------------------|------------------------|----------|------------|------------------------|----------------------------------|
| SiO <sub>2</sub> -1 | 30/1.8             | 0.5                    | 1.44     | MSMA/0.5   | 49.8                   | -45±6                            |
| SiO <sub>2</sub> -2 | 30/1.8             | 0.5                    | 1.44     | MSMA/1.5   | 43.1                   | -62±8                            |
| SiO <sub>2</sub> -3 | 30/2.05            | 0.25                   | 1.44     | MSMA/1.5   | 31.5                   | -35±6                            |

<sup>a</sup> Conditions: Silica formation 3 hours; Silane grafting: overnight; Ambient temperature; Purification through dialysis against methanol (cellulose membrane, MWCO=3500g/mol). <sup>b</sup> Obtained from DLS measurements (Number Average), methanol as dispersant. <sup>c</sup> Obtained from electrophoresis measurements, DI water as dispersant.

**Table S2.** Recipe for the Silane-Modified TiO<sub>2</sub> Nanoparticles for Encapsulation.<sup>a</sup>

| Sample Code         | Ethanol/Water (ml) | Hydrochloric acid (g) | TTIP (g) | Silane (g)         | Size (nm) <sup>b</sup> | Zeta Potential (mV) <sup>c</sup> |
|---------------------|--------------------|-----------------------|----------|--------------------|------------------------|----------------------------------|
| TiO <sub>2</sub> -1 | 40/1.2             | 0.15                  | 1        | MSMA/1.5           | 10                     | 40±5                             |
| TiO <sub>2</sub> -2 | 40/1.2             | 0.15                  | 1        | AEPTS/0.2+MSMA/1.3 | 8                      | 47±4                             |
| TiO <sub>2</sub> -3 | 40/1.2             | 0.15                  | 1        | AEPTS/0.5+MSMA/1.0 | 13                     | 52±6                             |
| TiO <sub>2</sub> -4 | 40/1.2             | 0.15                  | 1        | MTS/1.0+MSMA/0.5   | 15                     | 41±5                             |

<sup>a</sup> Conditions: Titania formation 3 minutes; Silane grafting: overnight; Ambient temperature; Concentration of hydrochloric acid: 12M; TTIP: Titanium isopropoxide; AEPTS: 3-[2-(aminoethylamino) ethylamino] propyl-trimethoxysilane; MTS: Methoxy(trimethyl)silane; Purification through dialysis against methanol (cellulose membrane, MWCO=3500g/mol). <sup>b</sup> Obtained from DLS measurements (Number Average), methanol as dispersant. <sup>c</sup> Obtained from electrophoresis measurements, DI water as dispersant.

**Table S3.** Recipe for Soapless Dispersion Polymerization for Encapsulation of nanoparticles (SiO<sub>2</sub>/TiO<sub>2</sub>) into Polymeric Latexes.<sup>a</sup>

| Sample Code         | Methanol/Water (ml) | Monomer (g) | Initiators (g) | NPs code/<br>amount (g)  | d <sub>n</sub> (nm) <sup>c</sup> | PDI <sup>c</sup> | Encapsulation efficiency(%) <sup>d</sup> | Index(%) <sup>e</sup> |
|---------------------|---------------------|-------------|----------------|--------------------------|----------------------------------|------------------|------------------------------------------|-----------------------|
| PIBSI1 <sup>b</sup> | 24/24               | 2.5         | K/0.015        | SiO <sub>2</sub> -1/0.25 | 735                              | 0.059            | 41.7                                     | 39.2                  |
| PIBSI2              | 24/24               | 2.5         | K/0.015        | SiO <sub>2</sub> -2/0.25 | 572                              | 0.283            | 70.5                                     | 50.5                  |
| PSSI1               | 43/5                | 2.5         | K/0.015        | SiO <sub>2</sub> -3/0.25 | 1386                             | 0.173            | 13.9                                     | 11.5                  |
| PSSI2               | 33/15               | 2.5         | K/0.015        | SiO <sub>2</sub> -3/0.25 | 518                              | 0.124            | 75.6                                     | 66.2                  |
| PSSI3               | 33/15               | 2.5         | K/0.015        | SiO <sub>2</sub> -3/0.36 | 433                              | 0.192            | 69.8                                     | 56.4                  |
| PSSI4               | 33/15               | 2.5         | K/0.015        | SiO <sub>2</sub> -3/0.14 | 525                              | 0.067            | 80.5                                     | 75.1                  |
| PSTI1               | 33/15               | 2.5         | A/0.015        | TiO <sub>2</sub> -1/0.25 | 460                              | 0.135            | 77.1                                     | 66.7                  |
| PSTI2               | 33/15               | 2.5         | A/0.015        | TiO <sub>2</sub> -2/0.25 | 385                              | 0.168            | 82.0                                     | 68.2                  |
| PSTI3               | 33/15               | 2.5         | A/0.015        | TiO <sub>2</sub> -3/0.25 | 177                              | 0.131            | 91.3                                     | 79.3                  |
| PSTI4               | 47/1                | 5           | A/0.015        | TiO <sub>2</sub> -2/0.5  | 495                              | 0.538            | 84.5                                     | 39.0                  |
| PSTI5               | 47/1                | 5           | A/0.015+N/0.3  | TiO <sub>2</sub> -2/0.5  | 890                              | 0.191            | 76.9                                     | 62.2                  |
| PSTI6               | 40/0                | 5           | V/0.012+D/0.16 | TiO <sub>2</sub> -2/0.5  | 1250                             | 0.177            | 85.7                                     | 70.5                  |
| PSTI7               | 40/0                | 5           | V/0.012+D/0.16 | TiO <sub>2</sub> -4/0.5  | 1760                             | 0.134            | 88.5                                     | 76.6                  |

<sup>a</sup> Conditions: 100rpm stirring rate; Reaction temperature: 60 °C; K: Potassium persulfate (KPS); A: 2,2'-Azobis(2-methylpropionamide) dihydrochloride (AIBA); V: 2,2'-Azobis[2-(2-imidazolin-2-yl)propane] dihydrochloride (VA-044); N: 2,2'-Azobisisobutyronitrile (AIBN); D: 2,2'-Azobis(2,4-dimethylvaleronitrile) (ADV). <sup>b</sup> PIBSI: SiO<sub>2</sub>-encapsulated Polyisobutyl methacrylate latex <sup>c</sup> Obtained from DLS measurements (Number Average). <sup>d</sup> Determined from the residual weight at 500 °C by thermogravimetric analysis (TGA)

<sup>e</sup> Product of Encapsulation efficiency and (1-PDI).
